# Supplementary material for: Therapeutic doses of ketamine acutely attenuate the aversive effect of losses during decision-making
Source: eLife. 2024 May 3;12:RP87529. doi: 10.7554/eLife.87529 (PMC11068354; doi:10.7554/eLife.87529)
Supplement: Figure 1—figure supplement 1—source data 1. [file elife-87529-fig1-figsupp1-data1.xlsx]

## Sheet: figure-data
FIGURE 1-figure supplement 1. Behavioral effect of 0.25mg/kg intramuscularly (IM) administered (top) and 0.5mg/kg intranasally (IN) administered (bottom) ketamine.
				monkey P						monkey Y
		loss		neutral		gain		loss		neutral		gain
	trial lag	mean	ste	mean	ste	mean	ste	mean	ste	mean	ste	mean	ste
saline - IM	1	-1.4212	0.0519	-0.6157	0.0291	0.6035	0.0205	-2.313	0.0574	-0.9636	0.0471	-0.0498	0.059
	2	-1.1058	0.0458	-0.0144	0.0325	0.3855	0.0233	-1.6832	0.0557	-0.5654	0.0423	0.7601	0.0316
	3	-0.6223	0.0375	0.0706	0.0257	0.1998	0.0202	-0.7727	0.0481	-0.2638	0.0397	0.2956	0.0321
	4	-0.386	0.0334	0.1923	0.0267	0.1629	0.0206	-0.3284	0.0334	-0.0657	0.0335	0.1517	0.0265
	5	-0.2223	0.0326	0.2152	0.0206	0.1004	0.0166	-0.1167	0.0363	0.0385	0.0352	0.0312	0.0325
ketamine - IM 0.25mg/kg	1	-1.0096	0.0847	-0.449	0.0471	0.5368	0.0507	-2.0675	0.0787	-0.7213	0.0798	-0.0349	0.1236
	2	-0.8939	0.0675	-0.026	0.0464	0.3724	0.0408	-1.5801	0.1152	-0.4011	0.045	0.6328	0.0447
	3	-0.4998	0.0801	0.0753	0.0648	0.2263	0.0329	-0.8194	0.0876	-0.2634	0.0741	0.3425	0.0352
	4	-0.2816	0.0764	0.1	0.0539	0.0691	0.0472	-0.4225	0.0904	-0.1344	0.0487	0.1414	0.0529
	5	-0.1337	0.0517	0.2975	0.0493	0.1091	0.047	-0.1677	0.049	0.0805	0.0639	0.0514	0.037
saline - IN	1	-1.4586	0.0493	-0.6808	0.0394	0.4731	0.019	-3.2917	0.1897	-1.3755	0.0893	0.4706	0.1299
	2	-1.2987	0.049	-0.0315	0.0302	0.3699	0.028	-2.3758	0.1718	-0.6463	0.0868	0.8617	0.0597
	3	-0.788	0.0373	0.058	0.0285	0.2176	0.0169	-1.0369	0.0918	-0.0344	0.1935	0.3104	0.0855
	4	-0.4286	0.0382	0.1198	0.0237	0.1889	0.0221	-0.2278	0.1811	0.136	0.068	0.1306	0.1718
	5	-0.184	0.0439	0.1665	0.0308	0.1295	0.0151	0.0161	0.0785	0.151	0.1445	0.2832	0.1496
ketamine - IN 0.5mg/kg	1	-1.2418	0.0833	-0.5276	0.039	0.4998	0.046	-2.4164	0.1102	-0.9128	0.095	0.47	0.0839
	2	-1.0197	0.0816	-0.0544	0.0828	0.3188	0.0292	-1.9281	0.1579	-0.5428	0.1035	0.8591	0.0719
	3	-0.5917	0.048	0.1344	0.0286	0.191	0.0445	-0.7572	0.1157	-0.1331	0.0889	0.4885	0.074
	4	-0.2697	0.0511	0.1279	0.0372	0.1208	0.0503	-0.1447	0.1147	-0.0511	0.0681	0.2594	0.0748
	5	-0.3516	0.0711	0.2233	0.0375	0.1233	0.0401	-0.0933	0.0585	-0.0584	0.0977	0.1838	0.0729
