# Supplementary material for: Therapeutic doses of ketamine acutely attenuate the aversive effect of losses during decision-making
Source: eLife. 2024 May 3;12:RP87529. doi: 10.7554/eLife.87529 (PMC11068354; doi:10.7554/eLife.87529)
Supplement: Figure 2—source data 1. [file elife-87529-fig2-data1.xlsx]

## Sheet: figure-data
FIGURE 2. Time course of plasma concentration of ketamine following intramuscular (IM) and intranasal (IN) administration.
	time from injection	IM 0.5mg/kg	time from injection	IN 0.5mg/kg	IN 0.5mg/kg	time from injection	IN 1mg/kg	IN 1mg/kg
plasma ketamine concentration (ng/mL)	0	0	0	0	0	0	0	0
	10	196.8	10	64.9	72.6	10	141	133
	25	164.8	25	65.4	101.5	25	173	190
	40	115.5	40	74.5	98.8	40	94.7	146
	60	84	60	60.2	95.5	60	88.4	133
						75	108	106
