# Supplementary material for: Therapeutic doses of ketamine acutely attenuate the aversive effect of losses during decision-making
Source: eLife. 2024 May 3;12:RP87529. doi: 10.7554/eLife.87529 (PMC11068354; doi:10.7554/eLife.87529)
Supplement: Figure 3—source data 1. [file elife-87529-fig3-data1.xlsx]

## Sheet: figure-data
FIGURE 3. Model comparison for saline sessions. Each row shows free (filled circles), unused (empty circles) and fixed (specific values) parameters of a variant of reinforcement learning (RL) model.
RL models for saline sessions	BIC
	monkey P	monkey Y	monkey B
	1.0e+04 *	1.0e+04 *	1.0e+04 *
Q (standard)	3.2684	3.0486	1.2889
Q-SE	3.2679	3.0359	1.2888
DF	3.1904	2.7004	1.1264
DF-R	3.2479	2.8912	1.194
NDF	3.2508	2.7561	1.1746
NDF-R	3.2854	2.9097	1.2107
DF-A	3.465	3.1123	1.374
