# Supplementary material for: Therapeutic doses of ketamine acutely attenuate the aversive effect of losses during decision-making
Source: eLife. 2024 May 3;12:RP87529. doi: 10.7554/eLife.87529 (PMC11068354; doi:10.7554/eLife.87529)
Supplement: Figure 4—source data 1. [file elife-87529-fig4-data1.xlsx]

## Sheet: figure-data
FIGURE 4. Model comparison for the effects of ketamine.
RL models for ketamine sessions	BIC
	monkey P	monkey Y	monkey B
	1.0e+03 *	1.0e+04 *	1.0e+03 *
DF (saline)	5.2478	0.9747	4.1985
common modulation for non-gain outcomes	4.8377	0.8823	3.7888
separate modulation between neutral and loss	4.9537	0.8828	3.8526
separate modulation between gain and non-gain	4.9256	0.8546	3.7373
separate modulation for gain, neutral and loss	4.7678	0.8487	3.6131
separate modulation of forgetting rate	5.0073	0.9194	4.12
increased perseveration	5.2043	0.8641	3.7166
separate mod. of all outcomes and increased perseveration	4.7638	0.8529	3.6709
increased misassignment in TCA	7.2362	1.0799	5.1682
increased spread in TCA	7.0144	0.9923	4.5951
increased statistical learning in TCA	6.4889	0.9431	4.3498
modulation of asset gating of outcome valuation	4.782	0.8681	3.7315
