# Supplementary material for: Therapeutic doses of ketamine acutely attenuate the aversive effect of losses during decision-making
Source: eLife. 2024 May 3;12:RP87529. doi: 10.7554/eLife.87529 (PMC11068354; doi:10.7554/eLife.87529)
Supplement: Figure 5—source data 1. [file elife-87529-fig5-data1.xlsx]

## Sheet: figure-data
FIGURE 5. Ketamine-induced behavioral modulation simulated with differential forgetting model (for saline session) and best-fitting K-model (for ketamine session).
				monkey	P					monkey	Y					monkey	B
		loss		neutral		gain		loss		neutral		gain		loss		neutral		gain
separate modulation for gain, neutral and loss		mean	std	mean	std	mean	std	mean	std	mean	std	mean	std	mean	std	mean	std	mean	std
saline sessions (simulated)	1	-1.2876	0.0306	-0.3642	0.0192	0.5169	0.0155	-2.2841	0.0341	-1.0754	0.0225	0.4159	0.0203	-2.5639	0.0551	-0.8665	0.038	0.485	0.0303
	2	-0.8755	0.0318	-0.1566	0.0212	0.2887	0.0185	-1.5354	0.0312	-0.6158	0.0241	0.2508	0.0192	-1.6481	0.0509	-0.3251	0.0389	0.2362	0.0481
	3	-0.559	0.0309	-0.0424	0.0196	0.141	0.0158	-0.8966	0.027	-0.2666	0.0236	0.1401	0.0199	-0.9273	0.044	-0.1243	0.0413	0.085	0.0397
	4	-0.374	0.0294	-0.0505	0.0205	0.0951	0.0171	-0.4786	0.0268	-0.1113	0.024	0.0534	0.0191	-0.4535	0.0462	0.0089	0.0496	-0.0228	0.0379
	5	-0.2235	0.0267	-0.0199	0.0188	0.0617	0.0157	-0.2162	0.0261	-0.0327	0.0211	0.0603	0.0183	-0.1185	0.0358	0.0348	0.038	-0.0146	0.0381
ketamine sessions (simulated)	1	-0.7525	0.0349	-0.0741	0.0293	0.4497	0.0227	-1.5278	0.0476	-0.4409	0.0241	0.4074	0.0265	-1.3117	0.0739	-0.2242	0.035	0.3647	0.0481
	2	-0.5134	0.0464	-0.0007	0.0395	0.2101	0.0313	-1.0053	0.034	-0.2268	0.0386	0.2268	0.0403	-0.8246	0.0663	-0.0523	0.0618	0.2746	0.0674
	3	-0.3276	0.0352	0.0024	0.0404	0.1298	0.028	-0.5673	0.0595	-0.1087	0.0378	0.131	0.0293	-0.3652	0.0809	-0.0436	0.0709	0.1012	0.0516
	4	-0.2197	0.041	-0.0417	0.0267	0.1181	0.0336	-0.3309	0.0401	-0.0539	0.0279	0.047	0.032	-0.2487	0.0815	0.1235	0.0501	-0.068	0.044
	5	-0.106	0.0409	0.0132	0.0479	0.0501	0.018	-0.1888	0.0545	0.0227	0.0327	0.0477	0.0275	0.0129	0.0484	0.0375	0.0632	0.1115	0.0615
separate mod. of all outcomes and increased perseveration
(moneky P)
saline sessions (simulated)	1	-1.3449	0.0245	-0.333	0.0185	0.4946	0.0185
	2	-0.8722	0.0297	-0.175	0.0182	0.2846	0.016
	3	-0.6089	0.0249	-0.0397	0.0209	0.1505	0.0153
	4	-0.3133	0.0283	-0.0339	0.0226	0.1118	0.0137
	5	-0.1788	0.0271	-0.0075	0.0211	0.0434	0.0161
ketamine sessions (simulated)	1	-0.9505	0.0412	-0.1349	0.0354	0.3409	0.0222
	2	-0.4656	0.0361	0.0197	0.0422	0.3022	0.0247
	3	-0.2578	0.0324	0.0664	0.0422	0.1959	0.0241
	4	-0.1396	0.0473	-0.0023	0.0468	0.142	0.0239
	5	-0.1	0.0636	0.11	0.0281	0.0673	0.0179
*Note: due to stocasticity in choice selection, simulations with
an identical set of parameters do not produce exactly identical data.
