# Supplementary material for: Therapeutic doses of ketamine acutely attenuate the aversive effect of losses during decision-making
Source: eLife. 2024 May 3;12:RP87529. doi: 10.7554/eLife.87529 (PMC11068354; doi:10.7554/eLife.87529)
Supplement: Figure 6—source data 1. [file elife-87529-fig6-data1.xlsx]

## Sheet: figure-data
FIGURE 6. Time course of ketamine-induced ocular nystagmus.
slow-phase ocular velocity (deg/s) during target fixation				monkey	P							monkey	Y							monkey	B
centripetal drift is measured as negative velocity	saline		ketamine (IM)		saline (IN)		ketamine (IN)		saline (IM)		ketamine (IM)		saline (IN)		ketamine (IN)		saline (IM)		ketamine (IM)		saline (IN)		ketamine (IN)
	mean	ste	mean	ste	mean	ste	mean	ste	mean	ste	mean	ste	mean	ste	mean	ste	mean	ste	mean	ste	mean	ste	mean	ste
	-0.1796	0.0352	-0.321	0.0683	-0.0215	0.0328	-0.1353	0.0419	-0.1253	0.0277	-0.1414	0.0476	-0.519	0.0429	-0.6125	0.0623	0.0154	0.0479	-0.1314	0.0633	-0.1226	0.0646	0.1268	0.061
	-0.1572	0.031	-0.586	0.0652	-0.0893	0.0357	-0.1828	0.0464	-0.1412	0.023	-0.2712	0.0466	-0.5711	0.0599	-0.5344	0.0451	0.1765	0.0444	0.0817	0.1178	-0.0263	0.0664	0.0979	0.0715
	-0.1395	0.0225	-0.5909	0.0694	-0.0412	0.0362	-0.2185	0.0476	-0.1375	0.0211	-0.6038	0.093	-0.4093	0.0486	-0.5648	0.0611	0.2233	0.0533	-0.2864	0.1265	0.21	0.0608	0.1234	0.0995
	-0.0703	0.0221	-0.638	0.0972	-0.0123	0.0406	-0.1185	0.0358	-0.1531	0.0264	-1.3383	0.1753	-0.4494	0.0682	-0.4033	0.0711	0.343	0.0509	-1.1769	0.1294	0.1257	0.0545	0.1518	0.0992
	-0.0645	0.0239	-0.6932	0.1016	0.0167	0.0335	-0.0753	0.0311	-0.2275	0.0287	-2.0574	0.272	-0.3796	0.0389	-0.5266	0.1139	0.3461	0.0494	-2.2418	0.3845	0.2282	0.049	-0.0039	0.0879
	0.0071	0.0223	-0.9086	0.1442	0.008	0.027	-0.0932	0.0377	-0.1653	0.0213	-2.6104	0.2411	-0.3388	0.0485	-0.3843	0.0968	0.4118	0.05	-3.2955	0.6778	0.2293	0.0526	-0.2269	0.0804
	-0.0152	0.0286	-1.1282	0.1498	-0.0013	0.0271	-0.0178	0.0516	-0.1429	0.0253	-2.4757	0.298	-0.3634	0.0444	-0.2832	0.0948	0.4329	0.0473	-4.3936	0.8024	0.1449	0.0482	-0.6199	0.154
	0.0021	0.0246	-1.2602	0.1699	0.0104	0.0287	0.0055	0.033	-0.0844	0.0215	-2.7419	0.2043	-0.3759	0.0438	-0.5449	0.1102	0.3937	0.058	-4.568	0.7877	0.2777	0.0553	-0.7706	0.206
	0.0303	0.0225	-1.3107	0.2062	0.055	0.0312	0.0238	0.0603	-0.1184	0.0302	-2.3973	0.2594	-0.2583	0.0572	-0.4681	0.099	0.2665	0.0611	-4.5525	1.1387	0.3138	0.0481	-1.1566	0.1839
	0.0357	0.0252	-0.9689	0.2275	0.0633	0.0373	0.0733	0.0664	-0.1192	0.03	-2.1359	0.2217	-0.3326	0.0522	-0.58	0.1593	0.3136	0.0619	-4.1587	0.93	0.4275	0.0777	-1.2568	0.1896
	0.0193	0.0282	-0.8824	0.2446	0.0309	0.0378	-0.0048	0.0911	-0.1418	0.029	-2.2411	0.2465	-0.2576	0.0754	-0.5915	0.1346	0.1827	0.077	-3.7496	0.7927	0.3834	0.0435	-1.404	0.197
	0.0199	0.0304	-0.8773	0.2812	0.0593	0.0317	0.0028	0.1011	-0.1126	0.0304	-2.3314	0.2217	-0.2578	0.0435	-0.4949	0.1733	0.2832	0.0625	-2.9661	0.6713	0.3641	0.0616	-1.1008	0.271
	0.0867	0.0189	-0.7205	0.2008	0.024	0.0293	-0.0069	0.1207	-0.138	0.0315	-2.02	0.2201	-0.3255	0.0645	-0.7178	0.1461	0.3719	0.0813	-3.0153	0.6508	0.2047	0.047	-1.2908	0.2453
	0.0693	0.0329	-0.9556	0.1604	0.0293	0.027	0.0239	0.1261	-0.0824	0.0271	-1.6815	0.1849	-0.2444	0.0477	-0.4549	0.1134	0.4027	0.0904	-2.9201	0.6061	0.3453	0.0557	-1.2793	0.2419
	0.0257	0.0347	-0.6318	0.1458	0.0444	0.0299	0.1565	0.0779	-0.0631	0.0293	-1.7146	0.1974	-0.1538	0.0701	-0.5342	0.1429	0.3127	0.0866	-2.638	0.3052	0.3008	0.0535	-1.2716	0.2364
	0.0571	0.0486	-0.8172	0.1285	0.0892	0.0349	0.1032	0.1056	0.0107	0.023	-1.6831	0.1619	-0.1805	0.0604	-0.653	0.1671	0.4203	0.0802	-2.0067	0.2177	0.4038	0.0703	-1.2951	0.1866
	0.1249	0.0497	-0.9485	0.1354	0.1433	0.0313	0.1032	0.092	-0.0239	0.0232	-1.3753	0.1225	-0.1877	0.055	-0.6474	0.144	0.3607	0.0861	-2.1149	0.2853	0.4238	0.0402	-1.366	0.2133
	0.2435	0.0488	-0.7795	0.1352	0.0935	0.0299	0.0373	0.0735	-0.0241	0.0238	-1.1567	0.1184	-0.1986	0.0307	-0.6327	0.1583	0.5081	0.0417	-2.1317	0.2366	0.4477	0.0448	-1.1204	0.252
	0.2465	0.0408	-0.4811	0.1438	0.0852	0.0323	0.0617	0.0551	-0.038	0.0265	-1.071	0.0992	-0.2411	0.0297	-0.5246	0.144	0.3826	0.0458	-1.8245	0.2888	0.3465	0.0566	-1.2238	0.1307
	0.2023	0.0418	-0.4939	0.1449	0.1129	0.0316	0.2249	0.0416	-0.0304	0.0305	-1.0246	0.0979	-0.2052	0.0483	-0.5099	0.129	0.5119	0.0587	-1.503	0.2464	0.322	0.0626	-1.0636	0.1526
	0.2138	0.0402	-0.3814	0.2158	0.1113	0.0392	0.2189	0.0259	-0.0663	0.0261	-0.7458	0.0805	-0.184	0.0616	-0.3892	0.1085	0.4425	0.0731	-1.4229	0.2032	0.3879	0.0617	-1.0583	0.145
	0.1798	0.0312	-0.2045	0.2026	0.108	0.0316	0.1881	0.0561	0.0738	0.0243	-0.7192	0.0556	-0.1624	0.0586	-0.4599	0.1589	0.4458	0.1159	-1.4339	0.1858	0.5321	0.0673	-0.9384	0.1529
	0.2261	0.0264	-0.0801	0.2449	0.0993	0.0399	0.2634	0.0509	0.0222	0.0248	-0.5413	0.0706	-0.1038	0.049	-0.4039	0.139	0.7552	0.2301	-1.1727	0.2363	0.381	0.0518	-0.9707	0.2323
	0.2325	0.0333	-0.3731	0.2135	0.1247	0.039	0.1583	0.1084	0.0297	0.0277	-0.6277	0.0554	-0.0905	0.0528	-0.2815	0.1288	0.6899	0.2349	-0.962	0.2385	0.567	0.0498	-1.084	0.1118
	0.2139	0.0311	-0.449	0.191	0.1387	0.0475	0.1085	0.124	0.0196	0.0298	-0.5242	0.068	-0.1042	0.0482	-0.383	0.1307	0.65	0.2339	-1.0409	0.1379	0.419	0.0496	-0.9742	0.1923
	0.2083	0.0381	-0.3305	0.2495	0.1137	0.0443	0.122	0.1635	0.0489	0.0281	-0.3733	0.0662	-0.1359	0.0401	-0.2697	0.1183	0.6198	0.2394	-1.2435	0.08	0.3591	0.0463	-0.9767	0.1012
	0.2332	0.0527	-0.0825	0.2543	0.1115	0.0398	0.0788	0.1283	0.047	0.0298	-0.3979	0.0521	-0.0211	0.0515	-0.2659	0.0784	0.7351	0.231	-0.953	0.0937	0.4231	0.0414	-0.9393	0.1602
	0.1955	0.0511	0.088	0.1845	0.0883	0.0733	0.0248	0.1093	0.0445	0.0322	-0.4075	0.0447	-0.052	0.0489	-0.2534	0.0456	0.7137	0.2344	-1.2157	0.1612	0.4281	0.0563	-0.8018	0.1507
	0.1482	0.0661	0.1418	0.2166	0.0888	0.1208	-0.1093	0.1122	0.0562	0.0276	-0.2625	0.0767	-0.1127	0.0509	-0.3154	0.0752	0.5565	0.2603	-0.9457	0.1577	0.3395	0.0476	-0.6748	0.1503
	0.1541	0.071	0.2437	0.1668	0.1424	0.0909	0.0161	0.102	0.046	0.0277	-0.2677	0.0629	-0.0602	0.0469	-0.1628	0.0936	0.4309	0.3275	-1.1698	0.3922	0.3977	0.0706	-0.7442	0.139
	0.2392	0.0674	0.1922	0.1779	0.173	0.0431	-0.0179	0.1066	0.0435	0.0225	-0.1936	0.0362	-0.0522	0.0337	-0.0773	0.0841	0.4575	0.1632	-1.0967	0.2809	0.3929	0.0826	-0.6569	0.1141
	0.2487	0.0581	0.2043	0.2072	0.173	0.0449	-0.1246	0.0957	0.065	0.0263	-0.2507	0.0579	-0.099	0.0484	-0.2063	0.0971	0.4934	0.0654	-0.713	0.1582	0.1699	0.1272	-0.6743	0.1298
	0.312	0.0574	0.2529	0.2309	0.1749	0.0601	0.036	0.109	0.0249	0.0236	-0.2004	0.0578	-0.1411	0.0333	-0.2739	0.09	0.5041	0.05	-0.8323	0.1027	0.237	0.121	-0.627	0.1247
	0.3496	0.0406	0.3026	0.2083	0.1422	0.031	0.0102	0.1201	0.0659	0.0272	-0.1214	0.0641	-0.0964	0.05	-0.2279	0.0522	0.5123	0.0672	-0.9652	0.1517	0.2545	0.1276	-0.67	0.1755
	0.386	0.0494	0.4453	0.1892	0.1621	0.0455	-0.1381	0.1679	0.0824	0.0242	-0.1861	0.049	-0.0712	0.0482	-0.1827	0.0549	0.5114	0.0707	-0.697	0.1295	0.2068	0.1378	-0.4404	0.0846
	0.303	0.0361	0.4347	0.173	0.1553	0.0421	0.1973	0.0723	0.0464	0.0246	-0.1532	0.0506	-0.0926	0.0415	-0.0682	0.0297	0.4834	0.0679	-0.5664	0.1358	0.1124	0.1463	-0.4135	0.0782
	0.2898	0.0396	0.4868	0.1225	0.2144	0.0284	0.2368	0.0709	0.0771	0.0226	-0.1038	0.0688	-0.1813	0.0365	-0.1412	0.0796	0.4147	0.0808	-0.3239	0.1917	0.4029	0.1525	-0.4666	0.1619
	0.2986	0.0564	0.5812	0.11	0.2066	0.035	0.0359	0.0681	0.0491	0.0307	-0.0984	0.0577	-0.0514	0.0425	-0.128	0.0366	0.5536	0.0912	-0.4299	0.1792	0.3675	0.1634	-0.4548	0.0433
	0.2849	0.0517	0.3443	0.0946	0.2257	0.03	0.1994	0.056	0.0684	0.0256	-0.148	0.0599	-0.0711	0.0581	-0.2505	0.063	0.4049	0.0739	-0.5428	0.1335	0.3218	0.139	-0.4204	0.1221
	0.2998	0.0523	0.3814	0.0871	0.2122	0.043	0.213	0.0682	0.0673	0.0258	-0.075	0.056	-0.1023	0.0476	-0.1792	0.0595	0.4023	0.0788	-0.2451	0.1303	0.2666	0.1611	-0.2087	0.1913
	0.2935	0.0573	0.51	0.1461	0.1833	0.0357	0.3274	0.0577	0.0693	0.0273	-0.1569	0.0541	-0.0849	0.0594	-0.2847	0.0853	0.3733	0.1096	-0.3339	0.0916	0.2771	0.1525	-0.3732	0.1432
	0.3087	0.0471	0.6147	0.2316	0.1869	0.03	0.2373	0.0576	0.0513	0.0313	-0.1748	0.0577	-0.0385	0.0511	-0.0531	0.0561	0.403	0.0642	-0.5006	0.1568	0.3205	0.1439	-0.4658	0.185
	0.3637	0.0482	0.5562	0.2345	0.2037	0.0369	0.1609	0.0672	0.0496	0.0322	-0.0185	0.0389	-0.1479	0.046	-0.2117	0.0749	0.4325	0.0687	-0.1511	0.4651	0.2338	0.1453	-0.1898	0.1306
	0.404	0.0444	0.5816	0.2304	0.2339	0.0439	0.034	0.1472	0.0636	0.0249	-0.037	0.0335	-0.0917	0.0425	-0.1764	0.079	0.4311	0.0747	-0.3639	0.1345	0.363	0.1186	0.0025	0.1625
	0.4332	0.0454	0.5854	0.2312	0.2177	0.0514	0.1709	0.1233	0.0921	0.0287	-0.1292	0.0601	-0.0382	0.0388	-0.2539	0.0824	0.4166	0.0895	-0.4455	0.1038	0.5323	0.1033	-0.0297	0.2085
	0.4236	0.0496	0.4859	0.1046	0.2081	0.0411	0.1683	0.1245	0.0475	0.0304	-0.0256	0.0544	-0.1282	0.0303	-0.1554	0.061	0.3904	0.0964	-0.4851	0.1857	0.4444	0.0973	0.0176	0.3942
	0.4561	0.0561	0.4116	0.1534	0.2676	0.06	0.2128	0.114	0.0311	0.026	-0.0765	0.0544	-0.127	0.0398	-0.1736	0.0237	0.3023	0.0967	-0.2435	0.1241	0.4011	0.0876	0.0623	0.3786
	0.4598	0.0828	0.3399	0.1583	0.2625	0.0706	0.1328	0.1201	0.0203	0.0292	-0.1182	0.0513	0.0284	0.0311	-0.0721	0.0488	0.4375	0.0922	-0.368	0.0977	0.288	0.0816	0.1962	0.3882
	0.425	0.0824	0.2723	0.1811	0.2141	0.0528	0.125	0.1526	0.0522	0.0264	-0.0255	0.056	-0.0197	0.0467	-0.1221	0.0551	0.3245	0.0899	-0.3375	0.1786	0.2931	0.0953	0.085	0.1655
	0.3689	0.0709	0.3517	0.1581	0.232	0.0362	0.0785	0.1506	0.1168	0.0316	-0.1156	0.0852	0.0188	0.0475	-0.2274	0.0775	0.3273	0.0899	-0.3346	0.1305	0.2308	0.1555	-0.1277	0.1189
	0.4043	0.0766	0.4404	0.1582	0.2131	0.077	0.0012	0.1366	0.0999	0.031	-0.06	0.0481	-0.1459	0.0404	-0.1364	0.0706	0.3449	0.071	-0.2085	0.1015	0.3805	0.1057	-0.1087	0.094
	0.3556	0.0598	0.3756	0.1376	0.1506	0.0572	-0.0212	0.1244	0.087	0.0232	-0.1906	0.0418	-0.1345	0.0407	-0.1517	0.0529	0.5332	0.0675	-0.386	0.1105	0.376	0.1318	0.1667	0.3142
	0.2846	0.0653	0.3675	0.0733	0.1183	0.037	-0.058	0.1256	0.1202	0.0265	-0.142	0.0626	-0.0945	0.0443	-0.1337	0.0712	0.5084	0.1096	-0.1555	0.2281	0.3567	0.1046	0.1073	0.3356
	0.3411	0.0712	0.4087	0.0962	0.2359	0.0352	-0.0139	0.0914	0.0958	0.0275	-0.1436	0.051	-0.0941	0.0357	-0.0471	0.0559	0.6011	0.1174	0.0448	0.2835	0.3324	0.0667	0.3378	0.2174
	0.3024	0.0642	0.3517	0.1119	0.2497	0.0381	0.0399	0.0933	0.0575	0.0274	-0.1509	0.0482	-0.1502	0.0522	-0.1942	0.0548	0.4128	0.0867	0.0979	0.3917	0.3948	0.0999	0.0328	0.2458
	0.2687	0.074	0.34	0.1126	0.1643	0.0497	-0.0214	0.0876	0.1082	0.0364	-0.1485	0.0451	-0.0159	0.0535	-0.109	0.0485	0.1177	0.1202	0.1211	0.2911	0.3496	0.1098	0.0772	0.2332
	0.4366	0.1032	0.3602	0.1195	0.1623	0.0348	0.1366	0.0514	0.0651	0.0298	-0.1014	0.0459	-0.1251	0.0494	-0.139	0.0671	0.1992	0.1035	-0.3659	0.1535	0.0205	0.1445	-0.0525	0.2924
	0.5286	0.0988	0.3226	0.1033	0.1925	0.0373	0.0736	0.0687	0.1016	0.031	-0.1186	0.0431	-0.0489	0.0383	-0.2152	0.0326	0.3154	0.0948	-0.272	0.0885	0.1478	0.149	0.2169	0.2056
	0.5509	0.1021	0.3367	0.1064	0.1905	0.0428	0.0862	0.0696	0.0848	0.0263	-0.0895	0.0529	-0.0574	0.051	-0.1042	0.0597	0.3072	0.077	-0.2126	0.0843	0.1451	0.1413	-0.0028	0.3134
	0.5408	0.1004	0.3945	0.0647	0.1621	0.0523	0.0953	0.0364	0.0994	0.0273	-0.0535	0.0486	-0.0924	0.0527	-0.1307	0.0507	0.2517	0.1212	0.02	0.1775	0.2302	0.1071	0.0031	0.2688
	0.5122	0.0976	0.4185	0.0637	0.247	0.0529	0.0657	0.0566	0.0627	0.0229	-0.0724	0.0313	-0.0505	0.047	-0.0394	0.0628	-0.0619	0.1115	-0.0094	0.1289	0.1844	0.0785	0.1253	0.2711
	0.4686	0.0625	0.411	0.0673	0.225	0.05	0.1259	0.0548	0.0477	0.03	-0.0584	0.0512	-0.1108	0.0446	-0.0257	0.0766	0.1463	0.1056	-0.0953	0.1263	0.2031	0.0575	0.0468	0.2696
	0.4433	0.0699	0.4888	0.0683	0.2956	0.1435	0.0347	0.0608	0.0134	0.032	-0.1272	0.0484	-0.0696	0.043	-0.0871	0.0564	0.4385	0.116	-0.1064	0.0879	0.2659	0.0604	0.1736	0.2641
	0.489	0.0729	0.3012	0.0553	0.1887	0.0878	0.0588	0.0427	0.0716	0.0324	-0.0772	0.0398	-0.0194	0.0638	-0.1011	0.0731	0.3653	0.1128	0.0115	0.1784	0.6065	0.2295	0.2292	0.187
	0.4257	0.075	0.3743	0.0576	0.1061	0.0718	-0.0587	0.066	0.0271	0.0228	-0.0641	0.0415	-0.0863	0.0487	-0.0258	0.0736	0.1865	0.0593	-0.072	0.1807	0.307	0.1138	0.1953	0.1821
	0.3804	0.0714	0.2953	0.0618	0.2196	0.0663	0.1134	0.0554	0.0417	0.0389	-0.0636	0.0763	-0.1236	0.0471	-0.0878	0.0545	0.411	0.0584	-0.0675	0.104	0.2934	0.1058	-0.0135	0.1098
	0.3653	0.0699	0.383	0.0633	0.4516	0.1019	0.0881	0.068	0.0543	0.0306	-0.0093	0.036	-0.0705	0.0358	-0.0716	0.0554	0.4247	0.0375	0.0422	0.1354	0.2539	0.0447	0.1056	0.0285
	0.3783	0.0503	0.3958	0.0798	0.2794	0.0809	0.0803	0.0751	0.0302	0.0294	-0.0138	0.064	-0.0356	0.0338	-0.0985	0.0612	0.6291	0.0503	-0.3327	0.1524	0.2566	0.0563	0.0172	0.0727
	0.4195	0.0567	0.2752	0.0579	0.2216	0.0853	-0.039	0.1791	0.0668	0.025	-0.0664	0.0346	-0.0835	0.0634	-0.2492	0.034	0.2718	0.0717	0.0507	0.1441	0.4945	0.1055	0.1178	0
	0.374	0.061	0.3107	0.0669	0.205	0.0977	0.0535	0.1071	0.0636	0.0314	0.0226	0.0419	-0.0522	0.0309	0.0117	0.0531	0.2043	0.1322	0.0793	0.1196	0.4807	0.113	0.2813	0
	0.3968	0.0861	0.3597	0.0926	0.1404	0.1163	-0.0173	0.1399	0.0155	0.0343	-0.101	0.0452	-0.0249	0.0534	-0.1286	0.0918	0.3532	0.0899	-0.0025	0.1616	0.7842	0.1522	-0.1269	0
	0.4703	0.0758	0.3191	0.1468	0.1726	0.096	-0.2738	0.2957	0.0636	0.0351	-0.136	0.0489	-0.0599	0.0325	-0.0534	0.0402	0.4139	0.1517	0.1744	0.0777	0.329	0.1137	0.3386	0
	0.4651	0.0772	0.3752	0.1509	0.1096	0.1436	-0.2638	0.2994	-0.0277	0.0282	-0.0541	0.0568	-0.0714	0.0538	0.0132	0.0625	0.3525	0.1008	-0.3028	0.1288	-0.1943	0.1163	0.275	0
	0.4532	0.065	0.366	0.1456	0.1642	0.1328	-0.2645	0.2977	-0.0112	0.0292	-0.0452	0.0411	-0.0611	0.0716	-0.1625	0.0636	0.436	0.07	-0.1258	0.2931	0.0334	0.136	0.3734	0
	0.4711	0.0619	0.2688	0.1524	0.167	0.1334	-0.2371	0.2987	-0.0396	0.0553	-0.0355	0.048	-0.0923	0.0449	-0.101	0.0473	0.16	0	0.3055	0.4039	-0.0062	0.0899	-0.2867	0
	0.4329	0.0548	0.1934	0.0827	0.2782	0.1218	-0.0249	0.1853	-0.0443	0.0598	-0.0716	0.0427	-0.1128	0.0403	-0.0896	0.0583	0.6972	0	0.6175	0.3053	0.3096	0.0576	-0.0372	0
	0.3251	0.0626	0.1476	0.1165	0.3398	0.1134	0.1535	0.1022	0.0066	0.0567	-0.045	0.0364	-0.1293	0.0657	-0.0406	0.0554	-0.0276	0	0.072	0.1959	0.1052	0.0474	0.53	0
	0.3793	0.0603	0.0239	0.1114	0.3403	0.0776	0.1292	0.0989	0.0789	0.0664	-0.1781	0.0807	-0.0754	0.0451	-0.0946	0.0395			-0.0497	0.1137	0.0399	0.0392	0.4554	0
	0.4088	0.0687	0.2595	0.0924	0.1725	0.0771	0.0409	0.071	0.1154	0.0852	-0.1283	0.057	-0.0557	0.042	0.002	0.0663			0.1035	0.0678	0.4819	0.0363	0.1728	0
	0.5336	0.1183	0.2439	0.0879	0.0204	0.1143	0.0464	0.0721	0.0392	0.0679	-0.1561	0.0463	-0.1354	0.0481	-0.1196	0.0531			-0.1073	0.0457	0.2546	0.0697	0.4946	0
