# Supplementary material for: Therapeutic doses of ketamine acutely attenuate the aversive effect of losses during decision-making
Source: eLife. 2024 May 3;12:RP87529. doi: 10.7554/eLife.87529 (PMC11068354; doi:10.7554/eLife.87529)
Supplement: Figure 7—source data 1. [file elife-87529-fig7-data1.xlsx]

## Sheet: figure-data
FIGURE 7. Time course of ketamine-induced modulation of outcome-dependent choice behavior.
			monkey	P							monkey	Y							monkey	B
ste is stdard deviation of the sampling distribution of
the difference from1000 random permutations of drug labels	loss		neutral		gain				loss		neutral		gain				loss		neutral		gain
	mean	ste	mean	ste	mean	ste			mean	ste	mean	ste	mean	ste			mean	ste	mean	ste	mean	ste
20 min	0.7772	0.146	0.1191	0.0986	-0.1865	0.0827			1.4579	0.24	0.6106	0.1336	-0.0176	0.0968			1.3839	0.2966	0.2649	0.1659	-0.228	0.1474
40 min	0.4385	0.159	-0.0352	0.11	-0.0828	0.0806			0.5261	0.1482	0.5209	0.1219	-0.1192	0.0852			1.6793	0.3845	0.3423	0.1197	-0.2308	0.2011
60 min	-0.0288	0.1552	0.2646	0.089	-0.1438	0.0751			0.0773	0.1083	0.2783	0.099	-0.1125	0.0946			0.4059	0.3333	0.3415	0.2899	-0.3782	0.2549
80 min	0.1622	0.142	0.2061	0.0835	-0.3503	0.104			0.1234	0.1223	0.298	0.0972	-0.2103	0.095			0.5251	0.4025	0.8372	0.3708	-0.2272	0.3281
20 min	0.3746	0.1884	0.1483	0.0924	-0.0159	0.0676			0.5438	0.1826	0.1281	0.1089	-0.3219	0.1421			1.1312	0.3022	0.5295	0.1625	-0.421	0.1554
40 min	0.2973	0.1505	0.0851	0.0864	-0.1859	0.0936			0.5657	0.1953	0.092	0.1036	-0.1609	0.0959			1.0924	0.3184	0.1595	0.0975	-0.1152	0.1836
60 min	0.4194	0.1934	0.1234	0.0743	-0.1489	0.083			0.3859	0.1821	0.1322	0.1039	-0.1714	0.1181			0.6928	0.3357	0.0685	0.1229	-0.2545	0.2065
80 min	0.1347	0.1689	0.0836	0.113	-0.0502	0.1014			-0.3781	0.1816	0.1223	0.1384	-0.1287	0.1565			-0.6386	0.4384	0.4634	0.2339	-0.2054	0.344
