# Supplementary material for: Therapeutic doses of ketamine acutely attenuate the aversive effect of losses during decision-making
Source: eLife. 2024 May 3;12:RP87529. doi: 10.7554/eLife.87529 (PMC11068354; doi:10.7554/eLife.87529)
Supplement: Figure 9—source data 1. [file elife-87529-fig9-data1.xlsx]

## Sheet: figure-data
FIGURE 9. Behavioral effects of ketamine do not spread over the sessions subsequent to the injection.
					monkey P						monkey Y						monkey B
saline sessions > 1 day after ketamine injection (0.5mg/kg, IM)			loss		neutral		gain		loss		neutral		gain		loss		neutral		gain
			mean	ste	mean	ste	mean	ste	mean	ste	mean	ste	mean	ste	mean	ste	mean	ste	mean	ste
		1	-1.2359	0.044	-0.6352	0.0416	0.5838	0.0254	-2.4911	0.0695	-1.0756	0.0454	0.0294	0.0452	-3.0277	0.1614	-1.1302	0.1227	0.6446	0.1548
		2	-1.0629	0.0357	-0.1266	0.0336	0.3729	0.021	-1.6875	0.0481	-0.6967	0.041	0.5658	0.0255	-2.2951	0.1037	-0.5099	0.0752	0.698	0.1362
		3	-0.6366	0.0354	-0.0269	0.031	0.1956	0.0214	-0.8962	0.0454	-0.3848	0.04	0.3014	0.0285	-1.1918	0.1168	-0.2119	0.0786	0.3614	0.0772
		4	-0.3473	0.0476	0.0427	0.0342	0.1489	0.0228	-0.4014	0.05	-0.1769	0.0352	0.0631	0.0305	-0.7003	0.1021	0.0085	0.072	0.2123	0.1022
		5	-0.2255	0.0377	0.1467	0.029	0.1622	0.0237	-0.1718	0.0444	0.0626	0.0265	0.041	0.0246	-0.2843	0.0831	0.0051	0.0669	0.1929	0.0689
saline sessions 1 day after ketamine injection (0.5mg/kg, IM)		1	-1.2449	0.058	-0.613	0.0382	0.5644	0.0317	-2.4407	0.0757	-0.9845	0.0638	-0.0053	0.0459	-3.0582	0.2212	-0.8924	0.1421	0.4526	0.1576
		2	-0.9978	0.0613	-0.1007	0.0402	0.3175	0.0327	-1.7115	0.0611	-0.6652	0.0519	0.5984	0.0386	-2.2346	0.1255	-0.638	0.046	1.088	0.1006
		3	-0.642	0.0459	0.0471	0.0314	0.235	0.0385	-0.8848	0.0494	-0.3808	0.0605	0.2325	0.0423	-1.1013	0.1021	-0.0426	0.0957	0.5496	0.0446
		4	-0.4175	0.0575	0.0966	0.0502	0.1448	0.0304	-0.5364	0.0443	-0.2286	0.0629	0.046	0.0414	-0.1655	0.1076	-0.1082	0.1146	0.0695	0.0988
		5	-0.1141	0.0658	0.0913	0.0305	0.079	0.0355	-0.2593	0.0645	-0.0814	0.0625	0.0454	0.0358	-0.178	0.0761	0.1037	0.1103	0.1388	0.0766
saline sessions > 1 day after ketamine injection (0.25mg/kg, IM)		1	-1.4093	0.0635	-0.6151	0.0327	0.595	0.0244	-2.2555	0.0699	-0.9069	0.0537	-0.0478	0.0684
		2	-1.1208	0.0543	-0.023	0.039	0.3939	0.0286	-1.6459	0.0692	-0.5364	0.0493	0.7285	0.0338
		3	-0.6014	0.0462	0.0489	0.0318	0.1998	0.0239	-0.7667	0.0645	-0.276	0.0452	0.2942	0.0392
		4	-0.3905	0.0371	0.2048	0.027	0.1558	0.0247	-0.3393	0.0414	-0.0698	0.0397	0.1379	0.0254
		5	-0.2234	0.0396	0.2225	0.0237	0.1195	0.0184	-0.1138	0.0471	0.037	0.0436	-0.0047	0.0389
saline sessions 1 day after ketamine injection (0.25mg/kg, IM)		1	-1.48	0.0872	-0.5821	0.0565	0.6354	0.0387	-2.4277	0.0955	-1.0931	0.0899	-0.0201	0.1206
		2	-1.0632	0.0902	0.0359	0.0552	0.3604	0.0403	-1.7474	0.0932	-0.6239	0.085	0.8064	0.0656
		3	-0.6612	0.0569	0.1292	0.0373	0.1979	0.0405	-0.7494	0.0503	-0.2357	0.0867	0.3094	0.0599
		4	-0.3634	0.0785	0.1645	0.0719	0.1709	0.0366	-0.2917	0.0593	-0.0596	0.0681	0.1714	0.0692
		5	-0.2214	0.0588	0.1968	0.045	0.0507	0.0347	-0.1037	0.0532	0.0496	0.0645	0.1099	0.0562
